# Supplementary material
Source: ML conference proceedings conference paper supplement (https://openaccess.thecvf.com/content/WACV2024/html/Manandhar_One_Style_Is_WACV_2024_paper.html)
Supplement: Supplementary file 2 [file Manandhar_One_Style_Is_WACV_2024_supplemental.zip]

Archive with 3 entries (3 files):
- 0644_codePytorch.zip
- 0644_supp.mp4
- 0644_supp.pdf
